# Supplementary material for: Anti-CTLA4 treatment reduces lymphedema risk through a systemic expansion of the FOXP3+ Treg population
Source: Research Square preprint supplement (doi:10.21203/rs.3.rs-3330226/v1), 2023-09-15
Supplement: Supplementary file 1 [file bc75349e78875618d7abfb94.xlsx]

## Sheet: Figure 2A
Gene Expression Human Fat Tissue
(fold expression from control group)
CD4
C1	1.487	LE1	2.655
C2	0.506	LE2	2.134
C3	0.877	LE3	1.64
C4	1.38	LE4	1.079
C5	1.243	LE5	3.024
C6	0.923	LE6	2.654
C7	1.063	LE7	0.634
C8	0.658	LE8	1.944
C9	1.371	LE9	0.94
CTLA4
C1	0.741	LE1	2.845
C2	0.715	LE2	1.54
C3	1.296	LE3	3.713
C4	1.541	LE4	3.042
C5	0.689	LE5	2.042
C6	1.118	LE6	0.813
C7	0.991	LE7	0.962
C8	0.889	LE8	1.174
C9	1.391	LE9	1.438
CD25
C1	0.971	LE1	6.332
C2	0.797	LE2	1.959
C3	0.576	LE3	0.927
C4	0.692	LE4	0.522
C5	2.12	LE5	2.213
C6	3.483	LE6	5.174
C7	0.261	LE7	0.615
C8	0.488	LE8	1.387
C9	3.437	LE9	2.44
FOXP3
C1	0.48	LE1	0.702
C2	0.362	LE2	1.157
C3	0.537	LE3	2.584
C4	1.662	LE4	0.995
C5	0.816	LE5	0.443
C6	0.523	LE6	0.368
C7	1.389	LE7	0.613
C8	1.381	LE8	0.266
C9	1.683	LE9	2.317

## Sheet: Figure 2B
CD4+ cells per mm2 skin tissue
CD4+ cells
C1	60.5968	LE1	149.581
C2	44.2193	LE2	43.1274
C3	65.5101	LE3	111.367
C4	43.1274	LE4	84.0712
C5	62.7805	LE5	131.02
C6	52.954	LE6	51.8621
C7	39.306	LE7	83.5253
C8	42.5815	LE8	104.27
C9	46.9489	LE9	143.576

## Sheet: Figure 2C
CTLA+ cells per mm2 skin tissue
CTLA4+ cells
C1	19.4934	LE1	41.5258
C2	7.68541	LE2	101.685
C3	14.4577	LE3	105.534
C4	16.1595	LE4	34.5936
C5	24.4303	LE5	19.4025
C6	9.43975	LE6	11.8542
C7	22.8575	LE7	29.0475
C8	21.453	LE8	36.3985
C9	25.9865	LE9	22.5877

## Sheet: Figure 2D
FOXP3+ cells per mm2 skin tissue
FOXP3+ cells
C1	12.4528	LE1	50.3613
C2	3.04779	LE2	24.8738
C3	7.49988	LE3	30.316
C4	9.03254	LE4	49.4666
C5	5.68098	LE5	83.9301
C6	28.5684	LE6	53.7499
C7	39.5471	LE7	41.3234
C8	15.8328	LE8	28.8176
C9	36.6153	LE9	37.9982

## Sheet: Figure 3B
3B: Tail volume increase in %
Week 0
C1	100	aCTLA4 1	100
C2	100	aCTLA4 2	100
C3	100	aCTLA4 3	100
C4	100	aCTLA4 4	100
C5	100	aCTLA4 5	100
C6	100	aCTLA4 6	100
C7	100	aCTLA4 7	100
C8	100	aCTLA4 8	100
C9	100	aCTLA4 9	100
C10	100	aCTLA4 10	100
Week 1
C1	151	aCTLA4 1	149
C2	155	aCTLA4 2	196
C3	179	aCTLA4 3	156
C4	164	aCTLA4 4	130.81
C5	204	aCTLA4 5	121.32
C6	217	aCTLA4 6	116.2
C7	173	aCTLA4 7	124.86
C8	243	aCTLA4 8	137
C9	177	aCTLA4 9	149
C10	184	aCTLA4 10	122
Week 2
C1	207	aCTLA4 1	129
C2	179	aCTLA4 2	161
C3	269	aCTLA4 3	175
C4	222	aCTLA4 4	166.72
C5	236	aCTLA4 5	139.96
C6	294	aCTLA4 6	163.29
C7	218	aCTLA4 7	121.32
C8	265	aCTLA4 8	163
C9	274	aCTLA4 9	189
C10	208	aCTLA4 10	163

## Sheet: Figure 3D
3D: Flourescence signal
10 min
C1	0.12	aCTLA4 1	8.12
C2	18.87	aCTLA4 2	128.97
C3	25.99	aCTLA4 3	23.8
C4	0.29	aCTLA4 4	0.04
C5	0.81	aCTLA4 5	23.8
C6	0.01	aCTLA4 6	9.09
C7	0.44	aCTLA4 7	30.75
C8	1.22	aCTLA4 8	49.96
C9	4.19	aCTLA4 9	51.29
C10		aCTLA4 10	26.26
20 min
C1	0.55	aCTLA4 1	3.24
C2	22.29	aCTLA4 2	82.28
C3	25.14	aCTLA4 3	24.2
C4	0.92	aCTLA4 4	0.65
C5	0.06	aCTLA4 5	24.2
C6	0.03	aCTLA4 6	8.4
C7	0.04	aCTLA4 7	31.88
C8	8.58	aCTLA4 8	51.05
C9	5.12	aCTLA4 9	54.04
C10	2.61	aCTLA4 10	52.21

## Sheet: Figure 3F
Lyve+ area per field
Lymphatic coverage in %
C1	7.29183	aCTLA4 1	6.81575
C2	7.69985	aCTLA4 2	5.35202
C3	9.30819	aCTLA4 3	5.66538
C4	10.1618	aCTLA4 4	8.73189
C5	10.1237	aCTLA4 5	5.97759
C6	7.24566	aCTLA4 6	6.79565
C7	9.45312	aCTLA4 7	8.91279
C8	6.91234	aCTLA4 8	6.02311
C9	9.63142	aCTLA4 9	9.12544
C10	7.01343	aCTLA4 10	7.21233
No. Of Lymphatic vessels per field
C1	10	aCTLA4 1	10
C2	12.5	aCTLA4 2	10.2
C3	10.2	aCTLA4 3	11
C4	8.2	aCTLA4 4	7.8
C5	9.8	aCTLA4 5	10.4
C6	7.8	aCTLA4 6	8
C7	11.4	aCTLA4 7	7.33333
C8	12.2	aCTLA4 8	9.8
C9	10.5	aCTLA4 9	10.8
C10	8.8	aCTLA4 10	9.7

## Sheet: Figure 3G
Foxp3+ cells per field
Fox3+ cells
C1	45.8	aCTLA4 1	42.2
C2	38.5	aCTLA4 2	62.45
C3	28.4	aCTLA4 3	45.6667
C4	42.4	aCTLA4 4	54.25
C5	33.6	aCTLA4 5	52.47
C6	28.8	aCTLA4 6	31.22
C7	11.8	aCTLA4 7	25.6
C8	24.6	aCTLA4 8	28.5
C9	19	aCTLA4 9	41.4
C10	33.2	aCTLA4 10	36.4

## Sheet: Figure 4A
Gene Expression in mouse tail tissue
(fold expression from control group)
Th1						Th2
Il2						Il10
C1	0.471271	aCTLA4 1	0.337649			C1	0.63	aCTLA4 1	0.48
C2	0.983745	aCTLA4 2	0.744495			C2	0.68	aCTLA4 2	0.6
C3	0.475326	aCTLA4 3	0.289519			C3	0.28	aCTLA4 3	0.24
C4	0.165747	aCTLA4 4	0.382909			C4	0.37	aCTLA4 4	0.75
C5	0.166389	aCTLA4 5	0.251431			C5	0.98	aCTLA4 5	0.73
C6	0.312783	aCTLA4 6	1.26359			C6	1.26	aCTLA4 6	0.51
C7	2.10805	aCTLA4 7	0.291685			C7	2.05	aCTLA4 7	2.24
C8	1.05038	aCTLA4 8	0.244564			C8	2.29	aCTLA4 8	1.46
C9		aCTLA4 9	0.431975			C9	0.46	aCTLA4 9	1.08
C10	3.26631	aCTLA4 10	0.927991			C10		aCTLA4 10	2.67
Infg						Il13
C1	0.867539	aCTLA4 1	0.433962			C1	1.16	aCTLA4 1	0.65
C2	0.738321	aCTLA4 2	0.561209			C2	0.66	aCTLA4 2	1.24
C3	0.457875	aCTLA4 3	0.369627			C3	0.48	aCTLA4 3	0.29
C4	0.565384	aCTLA4 4	0.691581			C4	0.52	aCTLA4 4	0.36
C5	1.07927	aCTLA4 5	0.739848			C5	0.41	aCTLA4 5	0.66
C6	1.72629	aCTLA4 6	4.07699			C6	2.01	aCTLA4 6	0.73
C7	2.00726	aCTLA4 7	0.515114			C7	0.84	aCTLA4 7	0.6
C8		aCTLA4 8	0.307458			C8		aCTLA4 8	0.4
C9	0.558064	aCTLA4 9	0.322408			C9	1.06	aCTLA4 9	1.34
C10		aCTLA4 10	2.60896			C10	1.86	aCTLA4 10	2.25
Tnfa						Ccr4
C1	0.66	aCTLA4 1	0.64			C1	1.61	aCTLA4 1	1.67
C2	0.61	aCTLA4 2	0.68			C2	2.38	aCTLA4 2	0.86
C3	0.12	aCTLA4 3	0.37			C3	0.25	aCTLA4 3	0.75
C4	0.43	aCTLA4 4	0.38			C4	0.03	aCTLA4 4	0.43
C5	0.2	aCTLA4 5	0.37			C5	0.25	aCTLA4 5	0.4
C6	0.13	aCTLA4 6	0.32			C6	0.42	aCTLA4 6	1.04
C7	0.77	aCTLA4 7	0.95			C7	0.42	aCTLA4 7	0.66
C8	0.91	aCTLA4 8	1.53			C8	1.25	aCTLA4 8	0.45
C9	3.01	aCTLA4 9	1.76			C9	2.49	aCTLA4 9	0.69
C10	3.48	aCTLA4 10	1.42			C10	0.37	aCTLA4 10	0.31
Cxcr3						Ccr8
C1	1.07	aCTLA4 1	1.43			C1	1.46	aCTLA4 1	1.33
C2	2.07	aCTLA4 2	1.24			C2	1.83	aCTLA4 2	1.45
C3	0.22	aCTLA4 3	0.83			C3	0.3	aCTLA4 3	0.81
C4	0.05	aCTLA4 4	0.72			C4	0.04	aCTLA4 4	0.41
C5	0.39	aCTLA4 5	1.13			C5	0.24	aCTLA4 5	0.82
C6	0.46	aCTLA4 6	0.79			C6	0.47	aCTLA4 6	1.79
C7	0.77	aCTLA4 7	1.15			C7	1.03	aCTLA4 7	0.95
C8	2.04	aCTLA4 8	0.58			C8	1.27	aCTLA4 8	0.53
C9	2.23	aCTLA4 9	1.49			C9	2.06	aCTLA4 9	1.06
C10	0.85	aCTLA4 10	2.08			C10	0.77	aCTLA4 10	2.58

## Sheet: Figure 4D
Cytokine levels in mouse Serum
Tnfa
C1	31.2	aCTLA4 1	48.18
C2	36.84	aCTLA4 2	42.5
C3	31.2	aCTLA4 3	48.18
C4	25.58	aCTLA4 4	48.18
C5	19.99	aCTLA4 5
C6	25.58	aCTLA4 6	53.88
C7	25.58	aCTLA4 7	25.58
C8	31.2	aCTLA4 8	42.5
C9	31.2	aCTLA4 9	25.58
C10	31.2	aCTLA4 10	19.99
Ccl5
C1	135.72	aCTLA4 1	102.46
C2	144.77	aCTLA4 2	105.42
C3	111.28	aCTLA4 3	117.04
C4	113.21	aCTLA4 4	144.77
C5	160.69	aCTLA4 5
C6	172.76	aCTLA4 6	39.03
C7	128.34	aCTLA4 7	72.31
C8	141.17	aCTLA4 8	120.84
C9	84.11	aCTLA4 9	132.04
C10	137.54	aCTLA4 10	82
Ccl4
C1	92.82	aCTLA4 1	149.94
C2	55.86	aCTLA4 2	120.81
C3	79.78	aCTLA4 3	116.98
C4	55.86	aCTLA4 4	189.91
C5	84.22	aCTLA4 5
C6	120.81	aCTLA4 6	160.29
C7	199.38	aCTLA4 7	237.1
C8	94.92	aCTLA4 8	238.55
C9	19.33	aCTLA4 9	167.05
C10	142.89	aCTLA4 10	84.22
KC
C1	13.29	aCTLA4 1	18.63
C2	21.25	aCTLA4 2	22.54
C3	17.31	aCTLA4 3	31.42
C4	42.49	aCTLA4 4	30.17
C5	19.94	aCTLA4 5
C6	28.91	aCTLA4 6	82.3
C7	33.91	aCTLA4 7	66.78
C8	40.67	aCTLA4 8	91.35
C9	52.69	aCTLA4 9	35.76
C10	31.42	aCTLA4 10	77.73
Mouse aCTLA4 5 died during tissue harvesting --> no serum available

[truncated: 8 more sheets: Figure 4F, Figure 5A, Figure 5C, Figure 5D , Figure 5F, Figure 6B, Figure 6D, Figure 6G]
